# Supplementary material for: Factors Influencing the Age of Complementary Feeding—A Cross-Sectional Study from Two European Countries
Source: PubMed Central journal article supplement (PMC6843416; doi:10.3390/ijerph16203799), 2019-10-09
Supplement: ijerph-16-03799-s001.pdf [file ijerph-16-03799-s001.pdf]

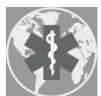

Article

# Factors influencing the age of complementary feeding – a cross-sectional study from two European countries

Monika A. Zielinska <sup>1</sup>, Petra Rust <sup>2,\*</sup>, Daria Masztalerz-Kozubek<sup>1</sup>, Jacqueline Bichler<sup>2</sup> and Jadwiga Hamułka <sup>1</sup>

**Table S1.** Study group socio-demographic characteristics according to the age of introducing complementary feeding into infant diet.

| Variable                                        | Poland<br>(n= 4065)<br>% (n) |             |             | p-value   | Austria<br>(n= 1750)<br>% (n) |            |            | p-value |
|-------------------------------------------------|------------------------------|-------------|-------------|-----------|-------------------------------|------------|------------|---------|
|                                                 | < 4 mo                       | 4-6 mo      | > 6 mo      |           | < 4 mo                        | 4-6 mo     | > 6 mo     |         |
| <b>Maternal age:</b>                            |                              |             |             |           |                               |            |            |         |
| - < 25 years                                    | 9.2 (9)                      | 5.5 (134)   | 3.2 (48)    | ≤ 0.001   | 6.6 (5)                       | 4.2 (55)   | 5.6 (20)   | 0.298   |
| - 25-29 years                                   | 34.7(34)                     | 34.9 (860)  | 28.3 (426)  |           | 32.9 (25)                     | 26.2 (345) | 24.4 (87)  |         |
| - 30-34 years                                   | 39.8 (39)                    | 45.2 (1111) | 52.3 (788)  |           | 26.3 (20)                     | 40.5 (534) | 38.7 (138) |         |
| - 35-39 years                                   | 14.3 (14)                    | 13.1 (322)  | 14.4 (218)  |           | 30.2 (23)                     | 24.5 (322) | 25.5 (91)  |         |
| - ≥ 40 years                                    | 2.0 (2)                      | 1.3 (33)    | 1.8 (27)    |           | 4.0 (3)                       | 4.6 (61)   | 5.8 (21)   |         |
| <b>Paternal age:</b>                            |                              |             |             |           |                               |            |            |         |
| - < 25 years                                    | 5.1 (5)                      | 1.7 (43)    | 0.7 (11)    | ≤ 0.001   | 4.0 (3)                       | 2.0 (27)   | 1.4 (5)    | 0.519   |
| - 25-29 years                                   | 23.5 (23)                    | 21.4 (526)  | 18.2 (274)  |           | 15.8 (12)                     | 14.3 (188) | 14.0 (50)  |         |
| - 30-34 years                                   | 42.9 (42)                    | 48.8 (1200) | 49.3 (743)  |           | 36.8 (28)                     | 34.9 (459) | 31.1 (111) |         |
| - 35-39 years                                   | 20.4 (20)                    | 21.1 (518)  | 25.6 (386)  |           | 25.0 (19)                     | 30.5 (402) | 30.8 (110) |         |
| - ≥ 40 years                                    | 8.1 (8)                      | 7.0 (173)   | 6.2 (93)    |           | 18.4 (14)                     | 18.3 (241) | 22.7 (81)  |         |
| <b>Maternal education:</b>                      |                              |             |             |           |                               |            |            |         |
| - primary and vocational                        | 6.1 (6)                      | 1.0 (25)    | 0.5 (7)     | ≤ 0.001   | 34.2 (26)                     | 26.2 (345) | 24.4 (87)  | 0.048   |
| - high school                                   | 19.4 (19)                    | 12.8 (316)  | 9.4 (142)   |           | 7.9 (6)                       | 3.1 (41)   | 4.5 (16)   |         |
| - University                                    | 74.5 (73)                    | 86.2 (2119) | 90.1 (1358) |           | 57.9 (44)                     | 70.7 (931) | 71.1 (254) |         |
| <b>Paternal education:</b>                      |                              |             |             |           |                               |            |            |         |
| - primary and vocational                        | 17.4 (17)                    | 10.5 (258)  | 6.5 (98)    | ≤ 0.001   | 48.7 (37)                     | 45.0 (593) | 44.0 (157) | 0.531   |
| - high school                                   | 25.5 (25)                    | 24.9 (613)  | 20.7 (312)  |           | 10.5 (8)                      | 6.4 (84)   | 6.7 (24)   |         |
| - University                                    | 57.1 (56)                    | 64.6 (1589) | 72.8 (1097) |           | 40.8 (31)                     | 48.6 (640) | 49.3 (176) |         |
| <b>Household size:</b>                          |                              |             |             |           |                               |            |            |         |
| - 2                                             | 3.1 (3)                      | 1.8 (45)    | 2.2 (33)    | 0.937     | 3.9 (3)                       | 2.1 (28)   | 2.2 (8)    | 0.521   |
| - 3                                             | 65.3 (64)                    | 62.6 (1539) | 61.6 (928)  |           | 53.9 (41)                     | 47.5 (626) | 44.0 (157) |         |
| - 4                                             | 24.5 (24)                    | 28.2 (694)  | 28.6 (431)  |           | 31.6 (24)                     | 38.1 (502) | 37.8 (135) |         |
| - 5                                             | 6.1 (6)                      | 5.4 (132)   | 5.8 (87)    |           | 6.6 (5)                       | 8.5 (112)  | 11.5 (41)  |         |
| - ≥ 6                                           | 1.0 (1)                      | 2.0 (50)    | 1.9 (28)    |           | 3.9 (3)                       | 3.7 (49)   | 4.5 (16)   |         |
| <b>Number of children in household:</b>         |                              |             |             |           |                               |            |            |         |
| - 1                                             | 69.4(68)                     | 68.4 (1682) | 66.9 (1008) | 0.344     | 55.3 (42)                     | 49.4 (651) | 45.4 (162) | 0.044   |
| - 2                                             | 24.5 (24)                    | 27.8 (683)  | 28.0 (422)  |           | 28.9 (22)                     | 37.4 (492) | 35.6 (127) |         |
| - ≥ 3                                           | 6.1 (6)                      | 3.8 (95)    | 5.1 (77)    |           | 15.8 (12)                     | 13.2 (174) | 19.0 (68)  |         |
| <b>Living area:</b>                             |                              |             |             |           |                               |            |            |         |
| - rural                                         | 17.4 (17)                    | 18.5 (454)  | 15.5 (234)  | 0.061     | 59.2 (45)                     | 57.6 (758) | 51.3 (183) | 0.091   |
| - urban                                         | 82.6 (81)                    | 81.5 (2006) | 84.5 (1273) |           | 40.8 (31)                     | 42.4 (559) | 48.7 (174) |         |
| <b>Living macroeconomic region (EU-28 GDP):</b> |                              |             |             |           |                               |            |            |         |
| - 47-50%                                        | 25.5 (25)                    | 15.2 (375)  | 10.9 (164)  | ≤ 0.001   | -                             | -          | -          | 0.080   |
| - 51-100%                                       | 50.0 (49)                    | 61.5 (1513) | 65.6 (988)  |           | 6.6 (5)                       | 5.1 (68)   | 6.4 (23)   |         |
| - 101-110%                                      | 24.5 (24)                    | 23.3 (572)  | 23.5 (355)  |           | 38.2 (29)                     | 41.3 (544) | 45.9 (164) |         |
| - 111-130%                                      | -                            | -           | -           |           | 25.0 (19)                     | 26.9 (354) | 24.1 (86)  |         |
| - 131-150%                                      | -                            | -           | -           |           | 7.9 (6)                       | 11.5 (151) | 6.2 (22)   |         |
| - >150%                                         | -                            | -           | -           | 23.3 (17) | 15.2 (200)                    | 17.4 (62)  |            |         |

| Average monthly income per capita <sup>1</sup> : |           |            |            |       |           |            |            |
|--------------------------------------------------|-----------|------------|------------|-------|-----------|------------|------------|
| - 1 <sup>st</sup> category                       | 2.0 (2)   | 1.6 (39)   | 1.2 (19)   |       | 9.2 (7)   | 8.3 (109)  | 9.2 (33)   |
| - 2 <sup>nd</sup> category                       | 22.4 (22) | 14.5 (357) | 13.8 (210) |       | 23.7 (18) | 21.0 (276) | 19.6 (70)  |
| - 3 <sup>rd</sup> category                       | 23.5 (23) | 33.0 (812) | 32.8 (499) | 0.235 | 27.6 (21) | 32.0 (422) | 30.0 (107) |
| - 4 <sup>th</sup> category                       | 17.4 (17) | 17.0 (419) | 17.8 (271) |       | 21.1 (16) | 26.5 (349) | 27.2 (97)  |
| - 5 <sup>th</sup> category                       | 7.1 (7)   | 12.4 (306) | 12.3 (187) |       | 15.8 (12) | 10.0 (132) | 11.8 (42)  |
| - 6 <sup>th</sup> category                       | 27.6 (27) | 21.4 (527) | 22.0 (335) |       | 2.6 (2)   | 2.2 (29)   | 2.2 (8)    |

<sup>1</sup> Average monthly income per capita categories are depend on country: 1<sup>st</sup> category < 500 PLN (Poland) or < 1000 EUR (Austria); 2<sup>nd</sup> category 500 – 1000 PLN or 1000 - 1500 EUR; 3<sup>rd</sup> category 1001 – 2000 PLN / 1501 – 2000 EUR; 4<sup>th</sup> category 2001 – 2500 PLN / 2001 – 3000 EUR; 5<sup>th</sup> category 2501 – 3000 PLN / 3001 – 5000 EUR; 6<sup>th</sup> category ≥ 3001 PLN / ≥ 5001 EUR.

**Table S2.** Children's characteristics including birth parameters and feeding methods.

| Variable                                             | Poland<br>(n= 4065)                          | Austria<br>(n= 1750)            | p-value |
|------------------------------------------------------|----------------------------------------------|---------------------------------|---------|
|                                                      | Mean ± SD <sup>1</sup><br>Min - Max<br>% (n) | Mean ± SD<br>Min - Max<br>% (n) |         |
| <b>Infant age:</b>                                   | 21.8 ± 7.2<br>12.0 – 36.0                    | 23.9 ± 7.7<br>12.0 – 36.0       | ≤ 0.001 |
| <b>Infant gender:</b>                                |                                              |                                 |         |
| - female                                             | 47.7 (1938)                                  | 50.1 (877)                      | 0.088   |
| - male                                               | 52.3 (2127)                                  | 49.9 (873)                      |         |
| <b>Pregnancy duration:</b>                           |                                              |                                 |         |
| - <37 weeks                                          | 6.4 (260)                                    | 6.3 (110)                       | 0.436   |
| - 37-42 weeks                                        | 93.1 (3784)                                  | 92.9 (1626)                     |         |
| - >42 weeks                                          | 0.5 (21)                                     | 0.8 (14)                        |         |
| <b>Birthweight to gestational age categories:</b>    |                                              |                                 |         |
| - SGA <sup>2</sup>                                   | 4.1 (167)                                    | 6.7 (118)                       | ≤ 0.001 |
| - AGA <sup>3</sup>                                   | 76.8 (3123)                                  | 80.1 (1401)                     |         |
| - LGA <sup>4</sup>                                   | 19.1 (775)                                   | 13.2 (231)                      |         |
| <b>Any breastfeeding:</b>                            |                                              |                                 |         |
| - no                                                 | 5.3 (215)                                    | 8.6 (150)                       | ≤ 0.001 |
| - yes                                                | 94.7 (3850)                                  | 91.4 (1600)                     |         |
| <b>Infant formula use at maternity ward:</b>         |                                              |                                 |         |
| - no                                                 | 40.5 (1647)                                  | 61.4 (1074)                     | ≤ 0.001 |
| - don't know                                         | 3.9 (159)                                    | 0.5 (9)                         |         |
| - yes                                                | 55.6 (2259)                                  | 38.1 (667)                      |         |
| <b>Infant formula use after discharge:</b>           |                                              |                                 |         |
| - no                                                 | 68.0 (2765)                                  | 68.0 (1190)                     | 0.988   |
| - yes                                                | 32.0 (1300)                                  | 32.0 (560)                      |         |
| <b>Age of introduction of complementary feeding:</b> |                                              |                                 |         |
| - < 4 months                                         | 2.4 (98)                                     | 4.3 (76)                        | ≤ 0.001 |
| - 4-6 months                                         | 60.5 (2460)                                  | 75.3 (1317)                     |         |
| - > 6 months                                         | 37.1 (1507)                                  | 20.4 (357)                      |         |
| <b>Complementary feeding method:</b>                 |                                              |                                 |         |
| - TSF <sup>5</sup>                                   | 28.1 (1144)                                  | 36.5 (639)                      | ≤ 0.001 |
| - partially BLW                                      | 54.6 (2218)                                  | 49.4 (865)                      |         |
| - BLW <sup>6</sup>                                   | 17.3 (703)                                   | 14.1 (246)                      |         |

<sup>1</sup> SD – standard deviation; <sup>2</sup> SGA – small to gestational age; <sup>3</sup> AGA – appropriate to gestational age; <sup>4</sup> LGA – large to gestational age;

<sup>5</sup> TSF – traditional spoonfeeding; <sup>6</sup> BLW – baby-led weaning.

**Table S3.** Univariate and multivariate regression analysis models of factors influencing the complementary feeding introduction before 4 months according to duration of pregnancy.

| Variable                                              | Preterm infants<br>(n= 370)                  |                           | Term infants<br>(n= 5445) |                        |                      |
|-------------------------------------------------------|----------------------------------------------|---------------------------|---------------------------|------------------------|----------------------|
|                                                       | OR <sup>1</sup> (95% CI <sup>2</sup> )       | aOR <sup>3</sup> (95% CI) | OR (95% CI)               | aOR (95% CI)           |                      |
| SOCIO-DEMOGRAPHIC FACTORS                             | <b>Maternal age:</b>                         |                           |                           |                        |                      |
|                                                       | - < 25 years                                 | 1.99 (0.73 – 5.46)        | 1.76 (0.49 – 6.29)        | 6.61 (2.33 – 18.73)*** | 3.44 (1.11 – 10.61)* |
|                                                       | - 25-29 years                                | 1.31 (0.78 – 2.21)        | 1.78 (0.92 – 3.45)        | 3.47 (1.59 – 7.60)**   | 2.82 (1.26 – 6.31)*  |
|                                                       | - 30-34 years                                | 1                         | 1                         | 1                      | 1                    |
|                                                       | - 35-39 years                                | 1.01 (0.56 – 1.83)        | 1.08 (0.51 – 2.25)        | 4.24 (1.83 – 9.83)***  | 3.45 (1.45 – 8.20)** |
|                                                       | - ≥ 40 years                                 | 0.90 (0.27 – 2.99)        | 0.65 (0.15 – 2.84)        | 2.07 (0.26 – 16.46)    | 1.09 (0.13 – 9.04)   |
|                                                       | <b>Maternal education:</b>                   |                           |                           |                        |                      |
|                                                       | - primary and vocational                     | 3.77 (1.63 – 8.70)**      | 2.27 (0.78 – 6.56)        | 5.73 (3.13 – 10.52)*** | 3.01 (1.41 – 6.45)** |
|                                                       | - high school                                | 3.14 (1.56 – 6.34)**      | 3.84 (1.58 – 9.33)**      | 1.53 (0.59 – 3.98)     | 1.22 (0.44 – 3.37)   |
|                                                       | - University                                 | 1                         | 1                         | 1                      | 1                    |
|                                                       | <b>Number of children in household:</b>      |                           |                           |                        |                      |
|                                                       | - 1                                          | 1.02 (0.61 – 1.70)        | 0.70 (0.37 – 1.32)        | 0.88 (0.48 – 1.60)     | 0.93 (0.49 – 1.77)   |
|                                                       | - 2                                          | 1                         | 1                         | 1                      | 1                    |
|                                                       | - ≥ 3                                        | 1.76 (0.77 – 4.05)        | 1.62 (0.57 – 4.56)        | 0.99 (0.33 – 2.94)     | 0.79 (0.26 – 2.43)   |
|                                                       | <b>Country:</b>                              |                           |                           |                        |                      |
|                                                       | - Austria                                    | 1.62 (1.02 – 2.57)*       | 2.59 (1.28 – 5.27)**      | 3.65 (2.07 – 6.42)***  | 2.13 (1.01 – 4.51)*  |
|                                                       | - Poland                                     | 1                         | 1                         | 1                      | 1                    |
|                                                       | <b>Living area:</b>                          |                           |                           |                        |                      |
|                                                       | - rural                                      | 0.99 (0.63 – 1.56)        | 0.77 (0.41 – 1.43)        | 1.61 (0.91 – 2.83)     | 0.84 (0.44 – 1.59)   |
|                                                       | - urban                                      | 1                         | 1                         | 1                      | 1                    |
| <b>Average monthly income per capita<sup>4</sup>:</b> |                                              |                           |                           |                        |                      |
| - 1 <sup>st</sup> category                            | 0.93 (0.28 – 3.10)                           | 0.27 (0.06 – 1.17)        | 2.88 (0.86 – 9.65)        | 1.98 (0.56 – 6.93)     |                      |
| - 2 <sup>nd</sup> category                            | 1.42 (0.70 – 2.89)                           | 0.93 (0.37 – 2.32)        | 2.02 (0.83 – 4.89)        | 1.86 (0.74 – 4.69)     |                      |
| - 3 <sup>rd</sup> category                            | 0.55 (0.29 – 1.06)                           | 0.58 (0.26 – 1.31)        | 1.25 (0.53 – 2.93)        | 1.43 (0.59 – 3.44)     |                      |
| - 4 <sup>th</sup> category                            | 1                                            | 1                         | 1                         | 1                      |                      |
| - 5 <sup>th</sup> category                            | 0.55 (0.24 – 1.24)                           | 0.73 (0.28 – 1.90)        | 1.52 (0.55 – 4.21)        | 2.01 (0.70 – 5.76)     |                      |
| - 6 <sup>th</sup> category                            | 1.04 (0.52 – 2.09)                           | 1.71 (0.71 – 4.09)        | 0.48 (0.13 – 1.82)        | 0.97 (0.24 – 3.92)     |                      |
| PREGNANCY-RELATED FACTORS                             | <b>Infant gender:</b>                        |                           |                           |                        |                      |
|                                                       | - female                                     | 1                         | 1                         | 1                      | 1                    |
|                                                       | - male                                       | 0.80 (0.52 – 1.24)        | 0.79 (0.46 – 1.37)        | 1.24 (0.71 – 2.17)     | 1.35 (0.76 – 2.39)   |
|                                                       | <b>Pregnancy duration [Hbd<sup>5</sup>]:</b> |                           |                           |                        |                      |
|                                                       |                                              | 0.69 (0.62 – 0.77)***     | 0.67 (0.58 – 0.76)***     | 1.15 (0.92 – 1.41)     | 1.12 (0.92 – 1.37)   |
| <b>Birthweight to gestational age categories:</b>     |                                              |                           |                           |                        |                      |
| - SGA <sup>6</sup>                                    | 1.20 (0.55 – 2.61)                           | 1.12 (0.44 – 2.81)        | 2.23 (0.87 – 5.71)        | 1.76 (0.66 – 4.74)     |                      |
| - AGA <sup>7</sup>                                    | 1                                            | 1                         | 1                         | 1                      |                      |
| - LGA <sup>8</sup>                                    | 1.40 (0.81 – 2.42)                           | 1.68 (0.83 – 3.39)        | 0.96 (0.44 – 2.06)        | 1.08 (0.49 – 2.38)     |                      |
| FEEDING-RELATED FACTORS                               | <b>Any breastfeeding:</b>                    |                           |                           |                        |                      |
|                                                       | - no                                         | 4.83 (2.38 – 9.78)***     | 0.27 (0.36 – 0.87)**      | 2.11 (0.90 – 4.99)     | 0.70 (0.26 – 1.86)   |
|                                                       | - yes                                        | 1                         | 1                         | 1                      | 1                    |
|                                                       | <b>Infant formula use at maternity ward:</b> |                           |                           |                        |                      |
|                                                       | - no                                         | 1                         | 1                         | 1                      | 1                    |
| - otherwise                                           | 1.84 (1.13 – 2.99)*                          | 1.75 (0.92 – 3.35)        | 0.88 (0.51 – 1.52)        | 0.39 (0.20 – 0.77)**   |                      |
| <b>Infant formula use after discharge:</b>            |                                              |                           |                           |                        |                      |
| - no                                                  | 1                                            | 1                         | 1                         | 1                      |                      |
| - yes                                                 | 2.73 (1.75 – 4.26)***                        | 2.01 (1.11 – 3.63)*       | 5.40 (2.95 – 9.90)***     | 7.81 (3.92 – 15.54)*** |                      |

<sup>1</sup> OR – univariate model; <sup>2</sup> CI – confidence intervals; <sup>3</sup> aOR – multivariate model; <sup>4</sup> Average monthly income per capita categories are depend on country: 1<sup>st</sup> category < 500 PLN (Poland) or < 1000 EUR (Austria); 2<sup>nd</sup> category 500 – 1000 PLN or 1000 – 1500 EUR; 3<sup>rd</sup> category 1001 – 2000 PLN / 1501 – 2000 EUR; 4<sup>th</sup> category 2001 – 2500 PLN / 2001 – 3000 EUR; 5<sup>th</sup> category 2501 – 3000 PLN / 3001 – 5000 EUR; 6<sup>th</sup> category ≥ 3001 PLN / ≥ 5001 EUR; <sup>5</sup> Hbd – hebdomas (week); <sup>6</sup> SGA – small to gestational age; <sup>7</sup> AGA – appropriate to gestational age; <sup>8</sup> LGA – large to gestational age; \* p-value ≤ 0.05; \*\* p-value ≤ 0.01; \*\*\* p-value ≤ 0.001.
